# Supplementary material
Source: PubMed Central journal article supplement (PMC2791397)
Supplement: NIHMS108735-supplement-1.pdf [file NIHMS108735-supplement-1.pdf]

Supplemental  
Figure A

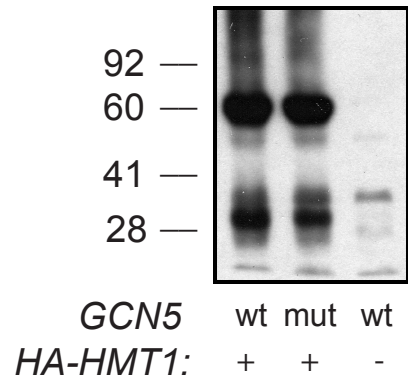

Supplemental  
Figure B

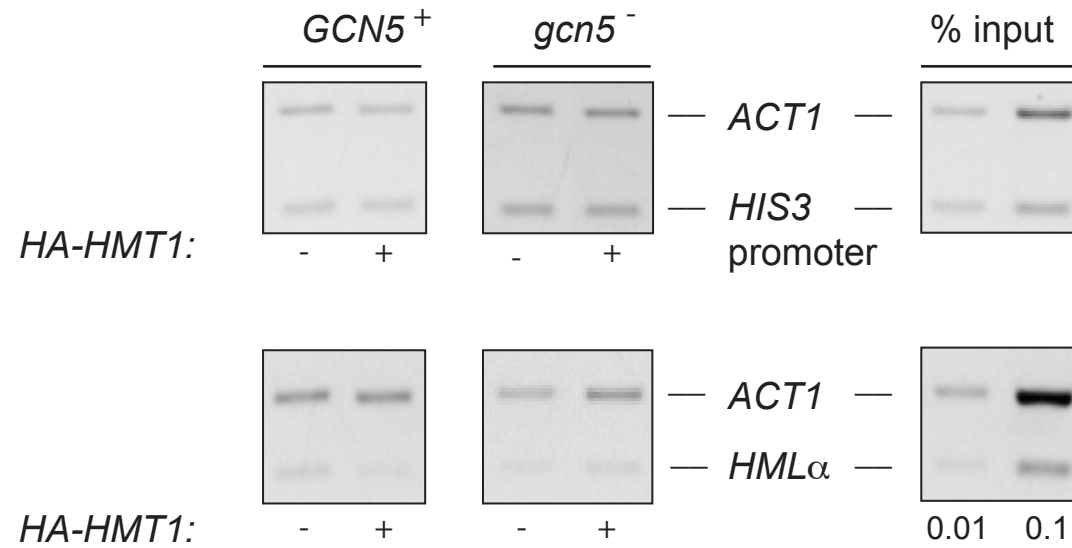

Supplemental  
Figure C

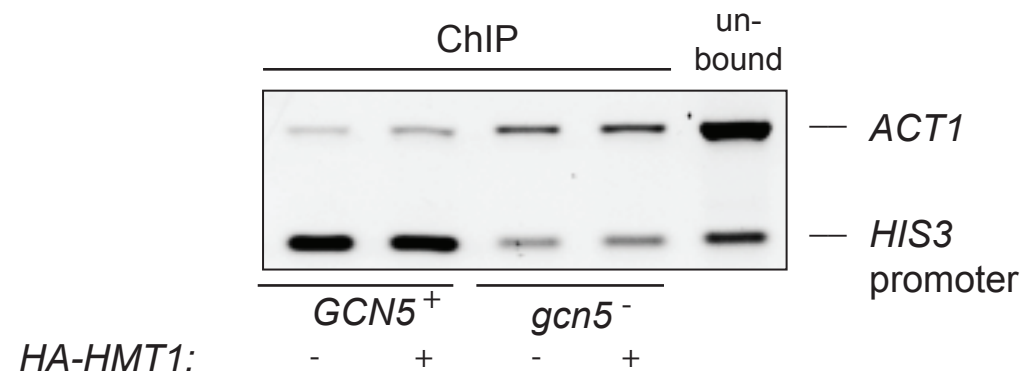

## Supplemental Figure Legend

A. Expression of HA-tagged Hmt1p in yeast. *GCN5*<sup>+</sup> and *gcn5*Δ cells were transformed with an empty ("–") vector or an otherwise identical plasmid containing *ADH1* promoter-controlled *HMT1* gene with a trimeric HA epitope tag at the amino terminus ("+" ). Log-phase cells were harvested and processed for whole cell lysate preparation, followed by Western blotting with anti-HA monoclonal antibodies.

B. Chromatin immunoprecipitation failed to detect HA-Hmt1p at either the transcriptionally active *HIS3* locus, or the silent *HML*α locus. Yeast cells (*MATa* mating type) bearing the empty vector or the *HA-HMT1* expression construct were harvested from minimal medium for chromatin immunoprecipitation with anti-HA antibodies. Each quantitative PCR reaction contained an *ACT1* fragment as the internal control for PCR efficiency comparison.

C. Expression of HA-Hmt1p does not affect H3 acetylation status at the *HIS3* promoter. ChIP was conducted on yeast lysates prepared from log-phase cells grown in minimal medium, wherein *GCN5*<sup>+</sup> and *gcn5*Δ cells exhibited different H3 acetylation levels at the *HIS3* promoter.
